# Supplementary material for: Progesterone attenuates temporomandibular joint inflammation through inhibition of NF-κB pathway in ovariectomized rats
Source: PubMed Central journal article supplement (PMC5681685; doi:10.1038/s41598-017-15285-w), 2017-11-10

## **Progesterone attenuates temporomandibular joint inflammation through inhibition of NF- $\kappa$ B pathway in ovariectomized rats**

Xin-Tong Xue<sup>1,2,†</sup> Xiao-Xing Kou<sup>1,2,†</sup>, Chen-Shuang Li<sup>1,2,4</sup>, Rui-Yun Bi<sup>3,5</sup>, Zhen Meng<sup>3,6</sup>, Xue-Dong Wang<sup>1,2</sup>, Yan-Heng Zhou<sup>1,2,\*</sup>, Ye-Hua Gan<sup>3,\*</sup>

<sup>1</sup>Department of Orthodontics, Peking University School and Hospital of Stomatology, Beijing, China; and <sup>2</sup>Center for Craniofacial Stem Cell Research and Regeneration, Peking University School and Hospital of Stomatology, Beijing, China; and <sup>3</sup>Center for Temporomandibular Disorders and Orofacial Pain, Peking University School and Hospital of Stomatology, Beijing, China; and <sup>4</sup>Section of Orthodontics, Division of Growth and Development, School of Dentistry, University of California, Los Angeles, Los Angeles, California, USA; and <sup>5</sup>The Third Dental Center, Peking University School and Hospital of Stomatology; and <sup>6</sup>Precision biomedical laboratory, Liaocheng People's Hospital, Liaocheng, China.

† Authors contributing equally to this work.

\*Co-corresponding authors:

Ye-Hua Gan, DDS, PhD. Center for Temporomandibular Disorders and Orofacial Pain, Peking University School and Hospital of Stomatology, 22# Zhongguancun South Avenue, Haidian District, Beijing 100081, China. Phone:+86-10-82195518; Fax: +86-10-62173402;

Email: kqyehuagan@bjmu.edu.cn

Yan-Heng Zhou, DDS, PhD. Department of Orthodontics. Peking University School and Hospital of Stomatology, 22# Zhongguancun South Avenue, Haidian District, Beijing 100081, China. Phone: +86-10-82195728; Fax: +86-10-82195536;

Email: yanhengzhou@vip.163.com

**Supplementary Information**

**Western film for Fig. 5**

**B**

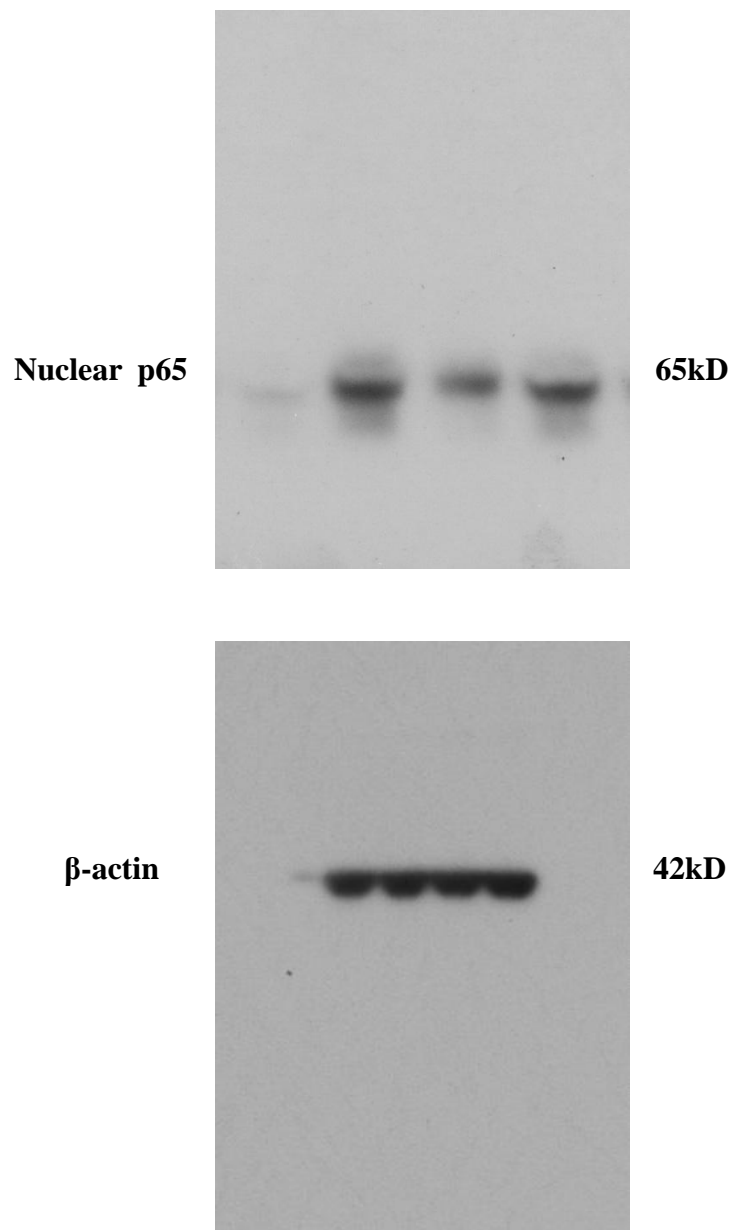

C

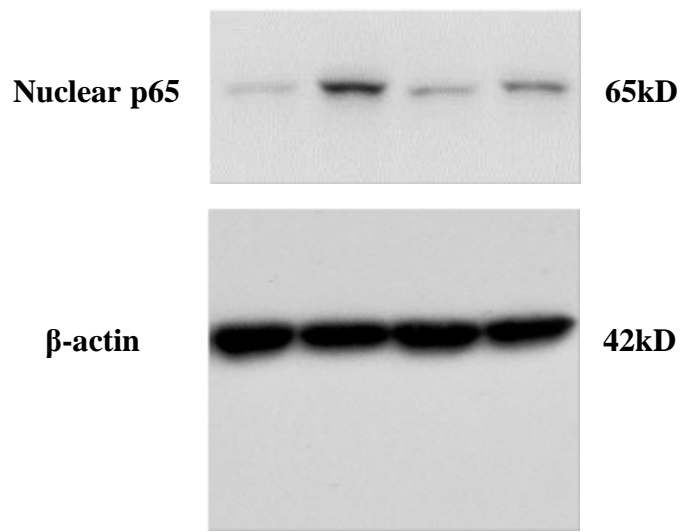

Supplement: 41598_2017_15285_MOESM1_ESM.pdf [file 41598_2017_15285_MOESM1_ESM.pdf]
